# Supplementary material
Source: HighWire-hosted journal article supplement (https://bmjopen.bmj.com/content/8/12/e024559)
Supplement: inline-supplementary-material-1 [file inline-supplementary-material-1.pdf]

("tuberculosis"[MeSH Terms] OR "tuberculosis"[All Fields]) AND (("therapy"[Subheading] OR "therapy"[All Fields] OR "treatment"[All Fields] OR "therapeutics"[MeSH Terms] OR "therapeutics"[All Fields]) AND outcome[All Fields] OR (Successful[All Fields] AND Unsuccessful[All Fields] AND outcome[All Fields]))
